# Supplementary material for: An ALE meta-analysis on the effects of neural changes due to exercise on executive function in a healthy population
Source: Research Square preprint supplement (doi:10.21203/rs.3.rs-5819986/v1), 2025-05-06
Supplement: Supplementary file 1 [file 67b15813d6bff162e37b4156.docx]

**Keyword used in Pubmed, Web of Science, PsycInfo, and Scopus**

((((((((((((((((((((((((((("executive function") OR ("executive control")) OR (inhibition)) OR (self-control)) OR ("working memory")) OR ("cognitive flexibility")) OR (shifting)) OR (flanker)) OR (stroop)) OR (n-back)) OR (1-back)) OR (2-back)) OR (3-back)) OR ("matching familiar figures")) OR ("conflicting motor response")) OR ("counting span task")) OR ("sentence span")) OR ("listening span")) OR ("wisconsin card sorting")) OR ("trail making test")) OR ("number letter task")) OR (“stop-signal”)) OR (“go/no-go”)) OR (“cognitive control”)) OR (updating)) OR (inhibitory)) OR (switch*)) AND

((((((fMRI) OR ("functional MRI")) OR ("functional magnetic resonance imaging")) OR ("functional imaging")) OR (“Diffusion Tensor Imaging”)) OR (“DTI”)) AND (((((((((((((((((((((((exercise) OR (sport)) OR ("physical activit*")) OR (aerobic)) OR (fitness)) OR (movement)) OR (finger)) OR (tapping)) OR (training)) OR (walk*)) OR (run)) OR (cycle)) OR (danc*)) OR ("Tai Chi")) OR (yoga)) OR (mind-body)) OR (writing)) OR (drawing)) OR ("eight-section brocade")) OR (“wuqinxi”)) OR (“qigong”)) OR (Pilates)) OR (“Tai Ji”))

**Keyword used in China National Knowledge Infrastructure (CNKI), Wanfang Database, and the China Science and Technology Journal Database (VIP)**

Subject: (Sports OR Exercise OR Physical training OR Physical activity OR Mind - body exercise OR Tai Chi OR Qigong OR Baduanjin OR Dance OR Yoga OR Pilates OR Wuqinxi OR Baifa Wubu OR Music OR Painting OR Writing) AND Subject: (Executive function OR Inhibition OR Executive control OR Updating OR Working memory OR Shifting OR Cognitive flexibility OR Cognitive control) AND Subject: (Magnetic resonance OR fMRI OR Diffusion tensor magnetic resonance OR DTI)
